# Supplementary figures and images for: Ethanol induces embryonic malformations by competing for retinaldehyde dehydrogenase activity during vertebrate gastrulation
Source: Oxford University Press journal article supplement (doi:10.1242/dmm.001420), 2009-04-07

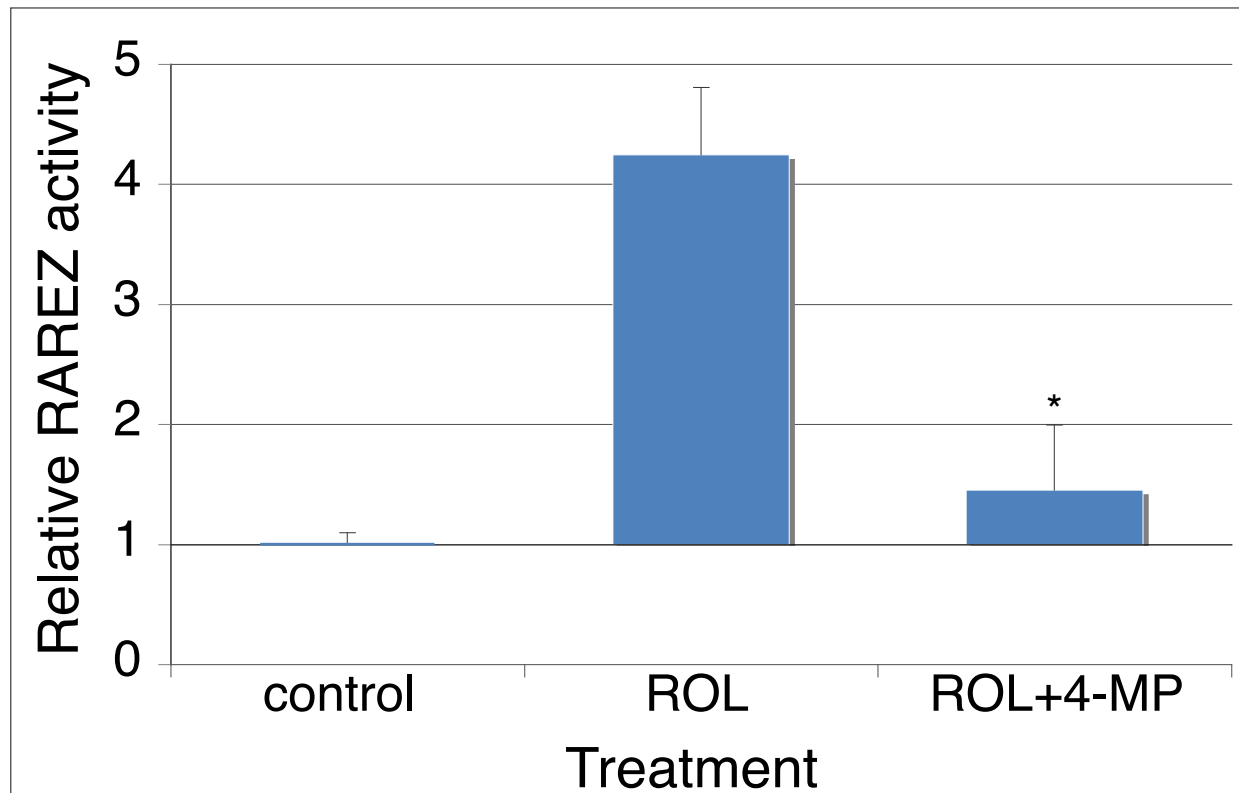

Supplement: dmm001420-sup-001420-figs1.pdf [file dmm001420-sup-001420-figs1.pdf]

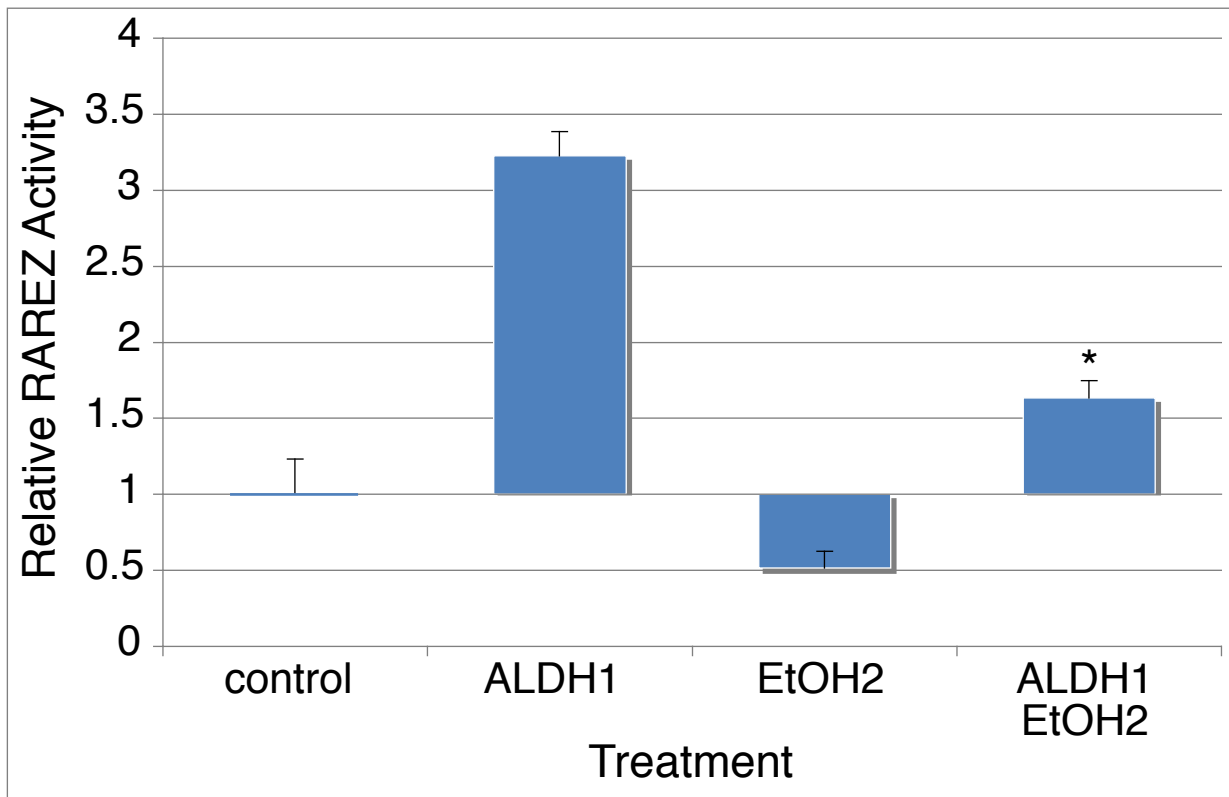

Supplement: dmm001420-sup-001420-figs2.pdf [file dmm001420-sup-001420-figs2.pdf]

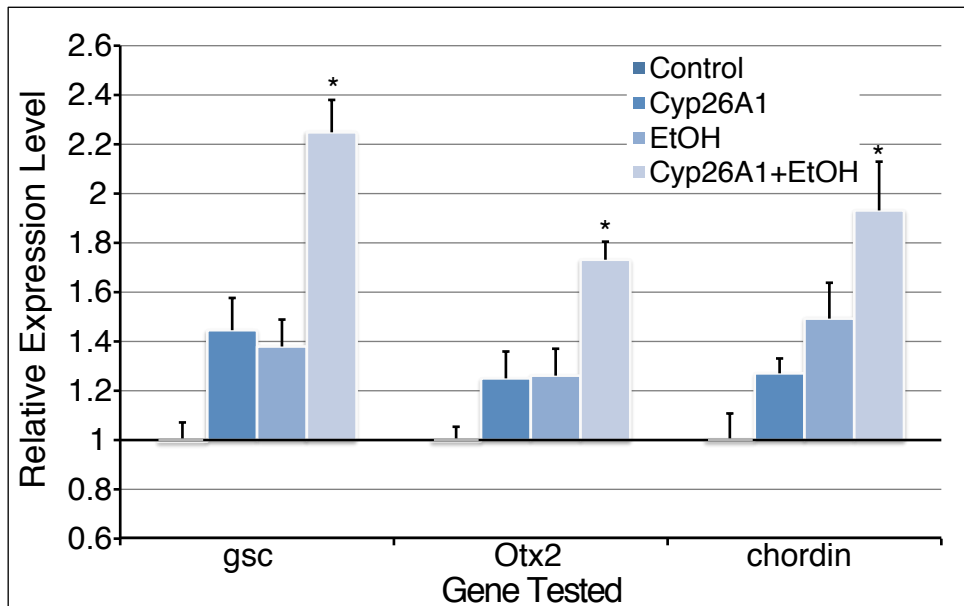

Supplement: dmm001420-sup-001420-figs3.pdf [file dmm001420-sup-001420-figs3.pdf]
